# Supplementary material
Source: Springer Nature journal article supplement (https://www.springermedizin.de/resource/supplementary/12913_2013_3574_MOESM1_ESM.pdf/9533162)

- 9. Catastrophic conditions
- 8. Dominant and Metastatic Malignancies
- 7. Dominant Chronic Disease in 3 or more Organ Systems
- 6. Chronic disease in 2 or more Organ Systems
- 5. Single dominant or moderate chronic disease
- 4. Minor chronic disease in multiple organ systems
- 3. Single minor chronic disease
- 2. History of significant acute disease
- 1. Healthy

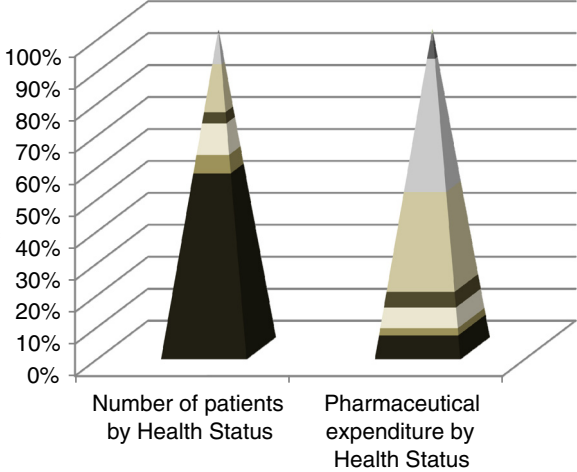

Supplement: MOESM1 [file 9533162]
